# Supplementary material for: Rb1 Haploinsufficiency Promotes Telomere Attrition and Radiation-Induced Genomic Instability
Source: Oxford University Press journal article supplement (doi:10.1158/0008-5472.can-12-3117), 2013-05-17
Supplement: 00085472can123117-sup-meth.pdf [file 00085472can123117-sup-meth.pdf]

## 1 Supplemental Methods

2

### 3 Primers used in this study

- 4 • RB1 PCR amplification primers:

5 5'NNNNGGATCCTTATTTTTGTAACGGGAGTCGGGAGAGGACG-forward

6 5'NNGCGGCCGCGTGGCCATAAACAGAACCTGGGAAAG-reverse

- 7 • *RB1* Sequencing primers:

8 *RB1*-cDNAf1 5'-GGAAGATGATCTGGTGATTTC

9 *RB1*-cDNAf2 5'-CTGCAGCAGATATGTATCTTTC

10 *RB1*-cDNAf3 5'-GTGCTGAAGGAAGCAACCCTC

11 *RB1*-cDNAr1 5'-CTCCAATACTCCATCCACAG

12 *RB1*-cDNAr2 5'-GTATCGCTGTGATCCAATTTC

- 13 • Rb1 sequencing:

14 mRb1c-1760f: CCTTGCATGGCTTTCAGATT

15 mRb1c-2085r: GAAGGCGTGACACAGAGTGTA

16 nRb1c-1763f : TGCATGGCTTTCAGATTCAC

17 mRb1c-2111r: GTGCTCTAGCTCTGGGTGGT

18 mRb1c-996f: GTATCATCTAATGGACTTCCAGAGG

19 mRb1c-1356r: AGATGTGCCCAACATCCTTT

20 mRb1c-1006f: ATGGACTTCCAGAGGTTGAAA

21 mRb1c-1380r: CAGCGTTAGCAAACCTTCTCTTT

22 mRb1 -5' -f1: TGTAACGGGAGTCGGGTGAG

- 1 mRb1 -5' -r1: TTCTCCCAAGTTAGCCAAGCTC
- 2 mRb1 -5' -f2: TTGTAACGGGAGTCGGGTGA
- 3 mRb1 -5' -r2: TCCATCCACGGATGAAACTT
- 4 Rb1 -f1: CCGATCATGTCAGAGAAAGAGCTTG
- 5 Rb1 -b1: TCAGGGTTGTTTTTTCGTGGC
- 6 Rb1 -f10:GAACGCCACGAAAAACAACC
- 7 Rb1 -b12: GATGATGTGCTCTAGCTCTGGGTG
- 8 Rb1 -b13: GAGTCCAGATGATGTGCTCTAGCTC
- 9 Rb1 -f19: CATTGAAATCTACCTCCCTTGCC
- 10 Rb1 -b29: GCATTCGTGTTTCGAGTGGAAGTC
- 11 Rb1 -b30 CCTCACTTTTCCTCCTTGTTTGAG
- 12 Rb1 -f20: GCTAGAGCACATCATCTGGACTCTG
- 13 Rb1 -b31: CTAACATGAGCAGAACCTGGGAAC
- 14 Rb1 -b32: GTGGCTTACGAATCACCCACAC
- 15 Rb1 -f29: ACTCCTGGCTCATGGTTGTGAC
- 16 Rb1 -b35: GCACTTGGGTTGTACTGTACTAGGG
- 17 Rb1 -b38: GCAAGTTCAAAAGACCCTGGAAG
- 18 Rb1 -f31: CATACTCAGACCCTCTAAGAACCG
- 19 Rb1 -b41: TGGTAAGCCCTTGACCTAAAACC
- 20
  - Cre genotyping
- 21 Cre1 (5'ACCAGCCAGCTATCAACTC 3')
- 22 Cre2 (5'TATACGCGTGCTAGCGAAGATCTCCATCTTCCAGCAG 3')

1 • Cre expression assays

Cre-694f 5'-TCCATATTGGCAGAACGAAA-3'

Cre-804r 5'-CAGCTACACCAGAGACGGAA-3'

Cre-379f 5'-AACATTTGGGCCAGCTAAAC-3'

Cre-446r 5'-AGCATTGCTGTCACTTGGTC-3'

Cre-642f 5'-GCCAGGATCAGGGTTAAAGA-3'

Cre-713r 5'-TTTCGTTCTGCCAATATGGA-3'

2 • R26R genotyping:

*R26R* forward: 5'AAAGTCGCTCTGAGTTGTTAT-3'

*R26R* reverse 1: 5'-GCGAAGAGTTTGTCTCAACC-3'

*R26R* reverse 2: 5'-GGAGCGGGAGAAATGGATATG-3'

3

4 • ARF (p19)

5 mP19 ARF -f1 TCTCACCTCGCTTGTCACAG

6 mP19 ARF -r1 CGCTAGCATCGCTAGAAGTG

7 mP19 ARF -f2 CTCACCTCGCTTGTCACAGT

8 mP19 ARF -r2 ACGCTAGCATCGCTAGAAGTG

9 • p53

10 Trp53\_ex.2\_f TGCATCCATACAGTACACAATCTC

11 Trp53\_ex.2\_r TTGTTTCTCTCAGGCAAGGG

12

13 Trp53\_ex.3+4\_f GCCTGGGATAAGTGAGATTCTG

1 Trp53\_ex.3+4\_r AGGCATTGAAAGGTCACACG  
2  
3 Trp53\_ex.5\_f ACACCTGATCGTTRACTCGGC  
4 Trp53\_ex.5\_rGAATAAGTCAGAAGCCGGGA  
5  
6 Trp53\_ex.6\_f GTTAGGACTGGCAGCCTCC  
7 Trp53\_ex.6\_rGACGCACAAACCAAACAAA  
8  
9 Trp53\_ex.7\_f GTAGGGAGCGACTTCACCTG  
10 Trp53\_ex.7\_rGGGACTCGTGGAACAGAAAC  
11  
12 Trp53\_ex.8\_f TGCTGGTCCTTTTCTTGTC  
13 Trp53\_ex.8\_rGAGCAAGAGGTGACTTTGGG  
14  
15 Trp53\_ex.9\_f TTGAGCTTCACCCCAAAGTC  
16 Trp53\_ex.9\_rATGCGAGAGACAGAGGCAAT  
17  
18 Trp53\_ex.10\_f ACCTTGTCCAGTGCTTCCAT  
19 Trp53\_ex.10\_r GGAGGGAGGTCTGGGTAGAG  
20 Trp53\_ex.11\_f GAGGAAAGCCCAAAGTCTGCTA  
21 Trp53\_ex.11\_r TAAGACAGCAAGGAGAGGGG  
22

- 1 • MDM2 primers

2 mMDM2 g QRT- f1 AGAACTGGCTTCCAGACGAT

3 mMDM2 g QRT- R1 CCTCAGCACATGGCTCTTTA

4 mMDM2 g QRT- f2 CTAGCTTCTCCCTGAATGCC

5 mMDM2 g QRT-R2 TTGCACACGTGAAACATGAC

6

7 **Statistical analysis:** Biological replicates used in these studies are cell lines that were  
8 established from different animals. Unless specifically stated all studies were performed  
9 with two biological replicates. Data represent mean +/- SD. Statistical analysis was  
10 performed using t-test unless stated. ANOVA was used for anaphase bridges before and  
11 after radiation. Statistical significance is indicated by \*\* P<0.01 or \*\*\* P<0.001 in all  
12 experiments.

13

14 **Expression assays:** Gene expression assays from Applied Biosystems (CA, USA) were  
15 used to quantify human *RB1* mRNA concentration (**Hs01078058\_g1**) and mouse *Rb1*  
16 mRNA (**Mm00485586\_m1**).

17 Expression assay oligos for junction between exon 18 and 20 of *Rb1*:

18 Forward primer: GCCTCTCCAGGGTAACCATACT

19 Reverse primer: TCCGACTAAATACACTCTGTGC

20 Quencher: CTAGACGGTACAATATCTG

21
